# Supplementary material for: Gemcitabine and Rapamycin Exhibit Additive Effect against Osteosarcoma by Targeting Autophagy and Apoptosis
Source: MDPI journal article supplement (doi:10.3390/cancers12113097), 2020-10-23
Supplement: s1 [file s1]

# Supplementary Materials: Gemcitabine and Rapamycin Exhibit Additive Effect Against Osteosarcoma by Targeting Autophagy and Apoptosis

Takashi Ando, Jiro Ichikawa, Taro Fujimaki, Naofumi Taniguchi, Yoshihiro Takayama and Hiroataka Haro

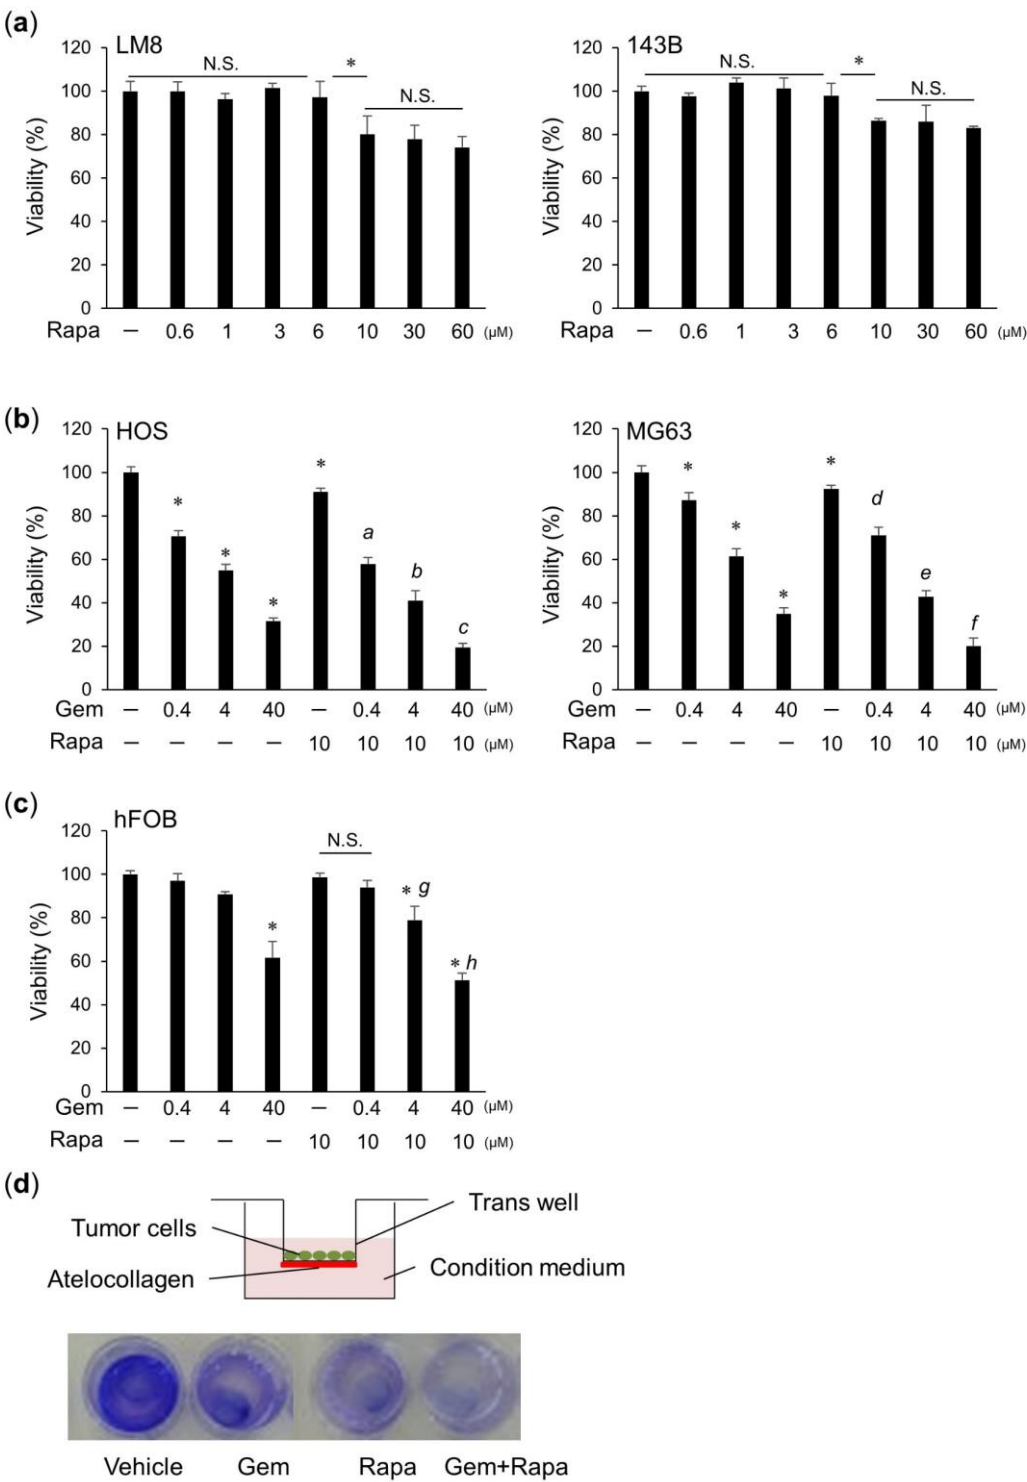

**Figure S1.** (a) LM8 and 143B OS cell lines were treated with Rapa and cell viability was measured using WST-8 assays. (b) HOS and MG63 OS cells and (c) hFOB osteoblast cells were treated with Gem alone or in combination with Rapa and cell viability was measured using WST-8 assays. Data are shown as the mean  $\pm$  SD ( $n = 4$ ). \* $P < 0.05$  vs. vehicle; a–f,  $P < 0.05$  vs. Rapa alone. N.S., not significant. (d) Schematic of the cell invasion assay methodology.

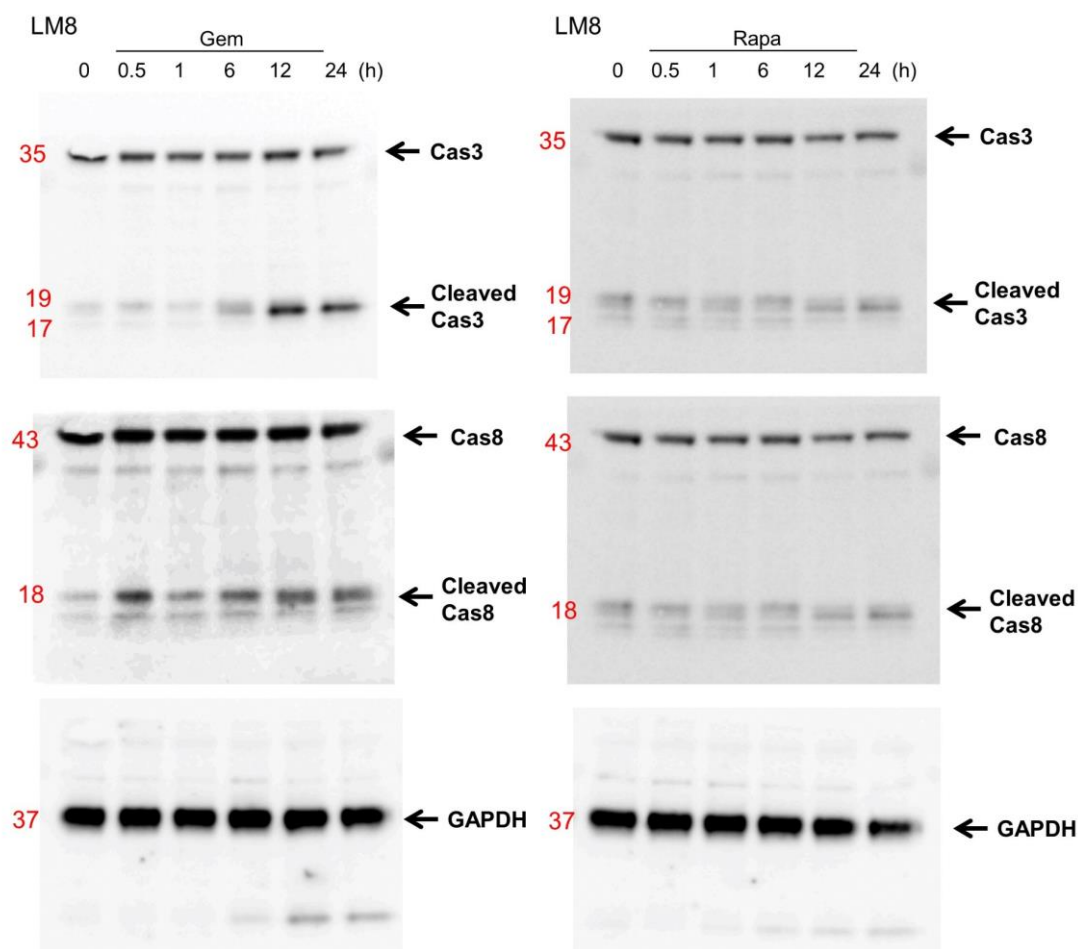

**Figure S2.** Example uncropped western blots depicting the expression of cleaved caspase 3, cleaved caspase 8, and GAPDH in LM8 cell lysates. These blots complement the cropped blots shown in Figure 2c.

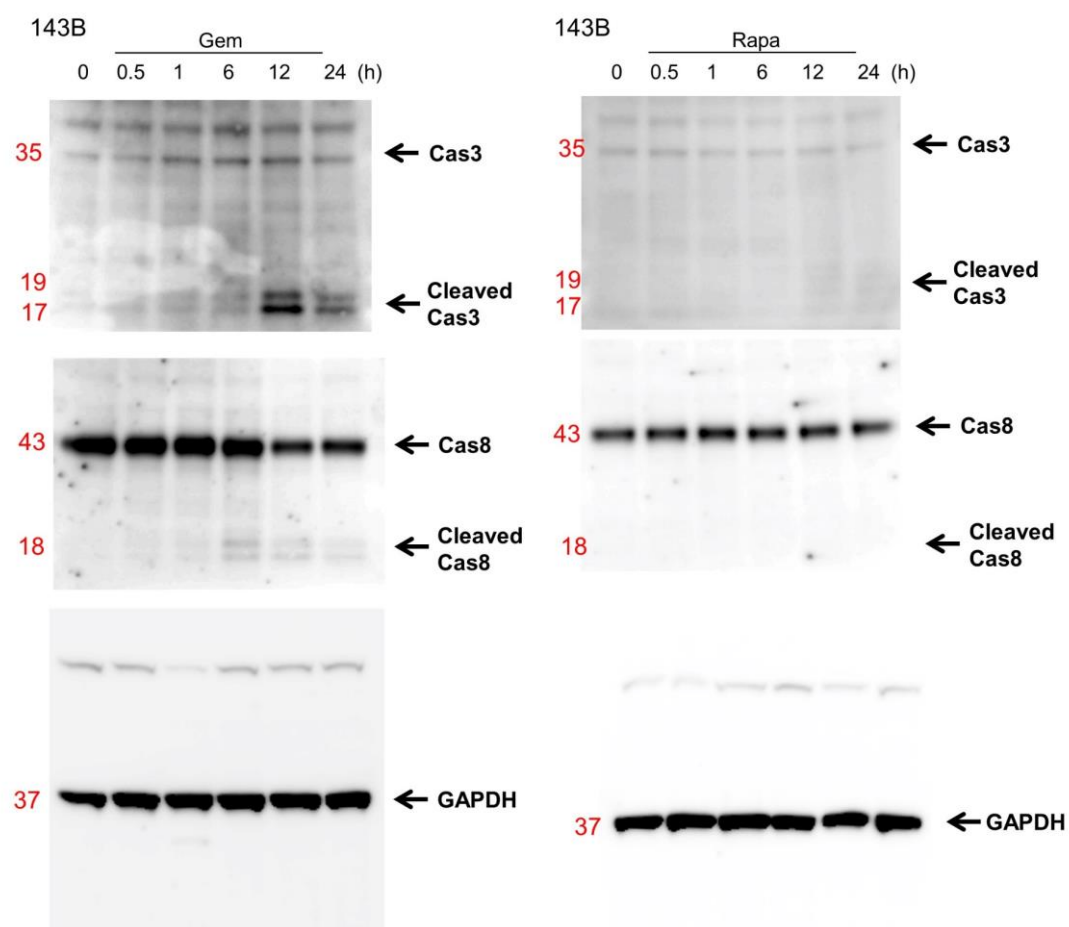

**Figure S3.** Example uncropped western blots depicting the expression of cleaved caspase 3, cleaved caspase 8, and GAPDH in 143B cell lysates. These blots complement the cropped blots shown in Figure 2c.

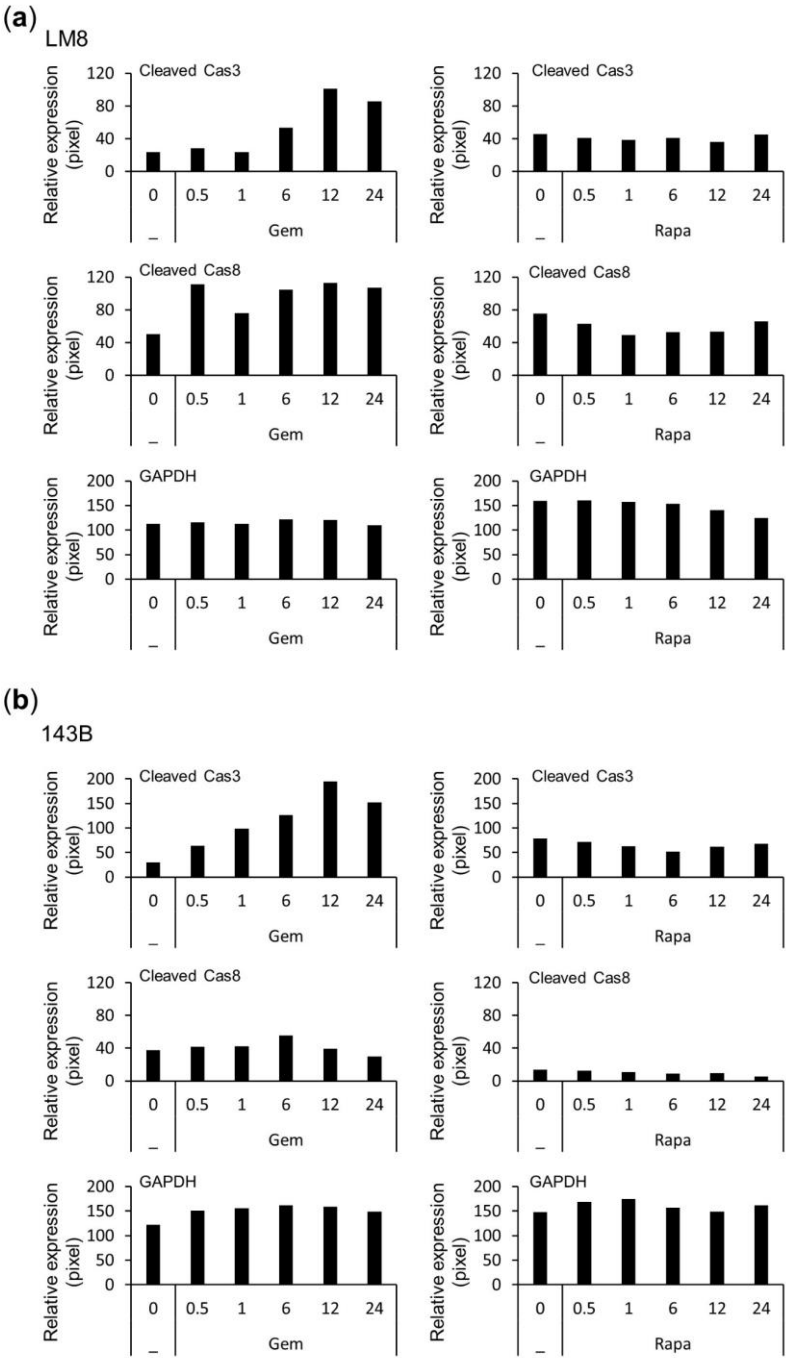

**Figure S4.** Quantification of cleaved caspase 3, cleaved caspase 8, and GAPDH bands in western blots depicted in Figure 2d. (a) LM8 cells. (b) 143B cells.

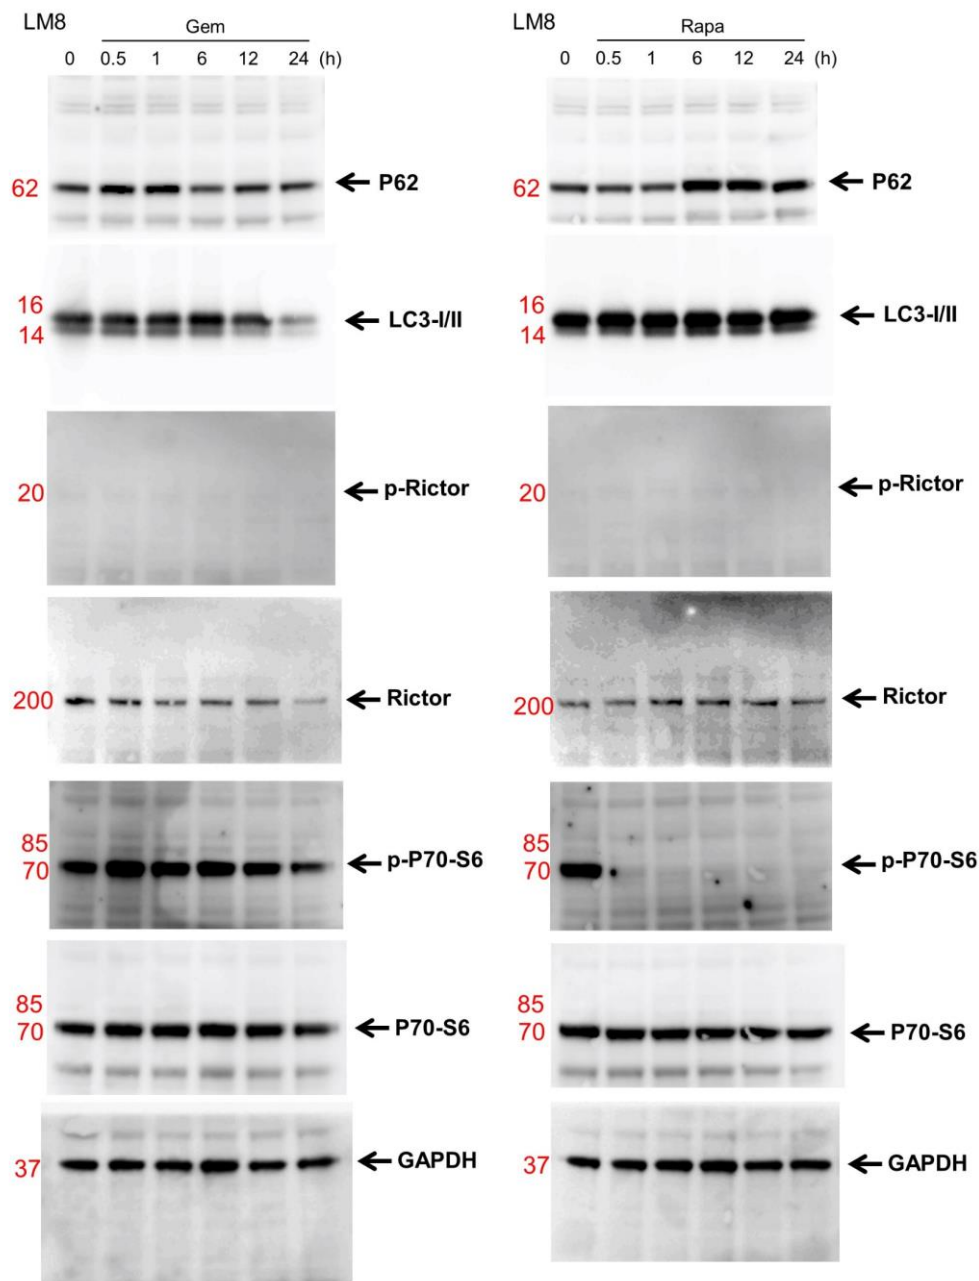

**Figure S5.** Example uncropped western blots depicting the expression of p62, LC3-I/II, p-RICTOR, RICTOR, p-P70-S6, P70-S6, and GAPDH in LM8 cell lysates. These blots complement the cropped blots in Figure 3a.

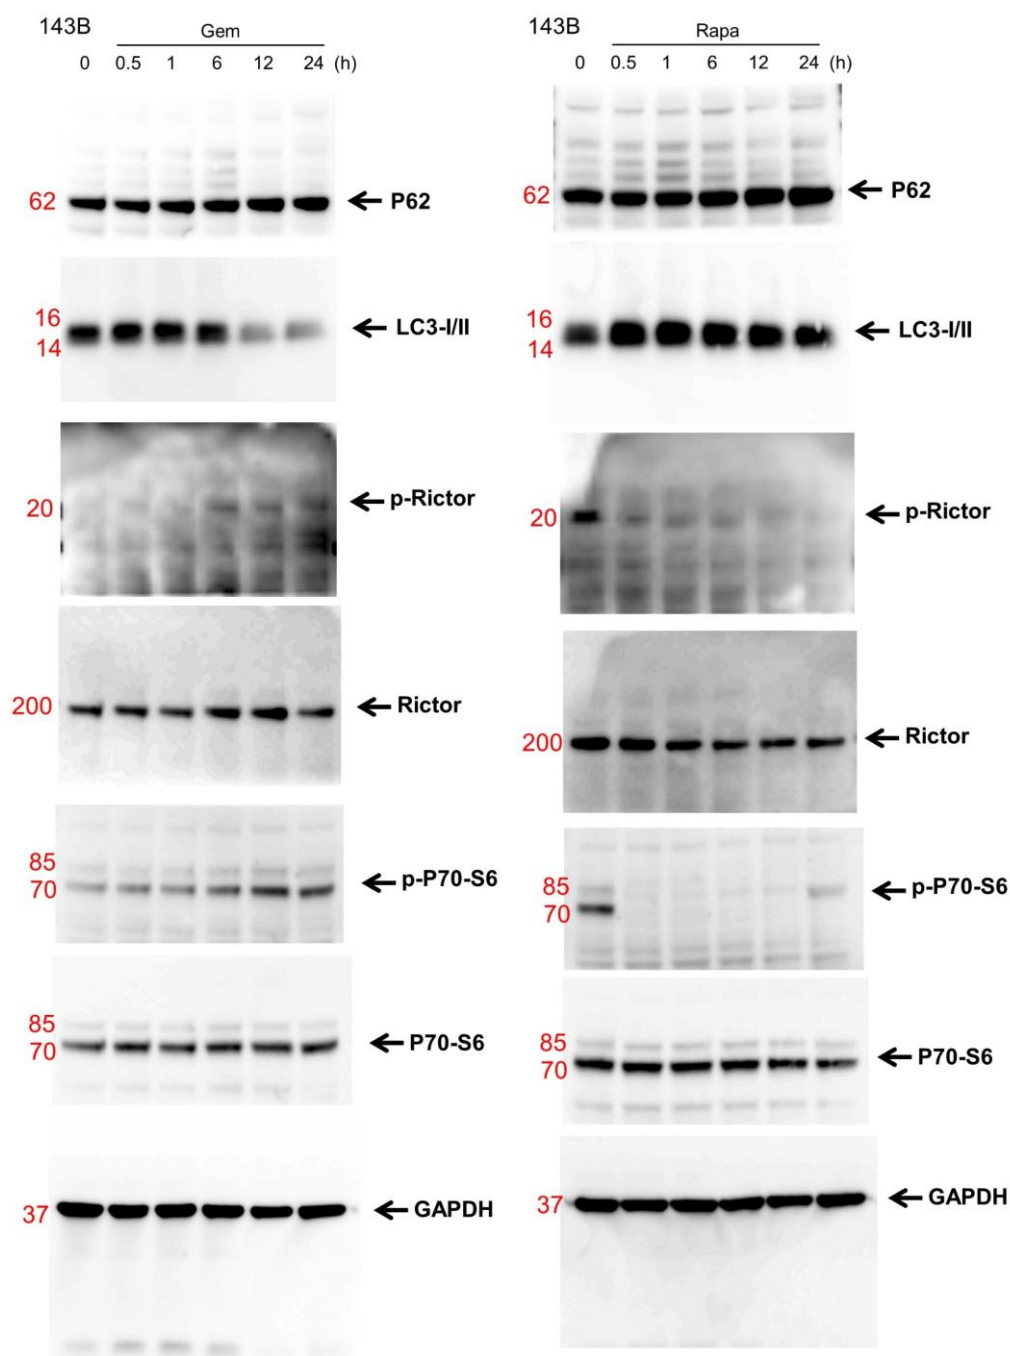

**Figure S6.** Example uncropped western blots depicting the expression of p62, LC3-I/II, p-RICTOR, RICTOR, p-P70-S6, P70-S6, and GAPDH in 143B cell lysates. These blots complement the cropped blots in Figure 3a.

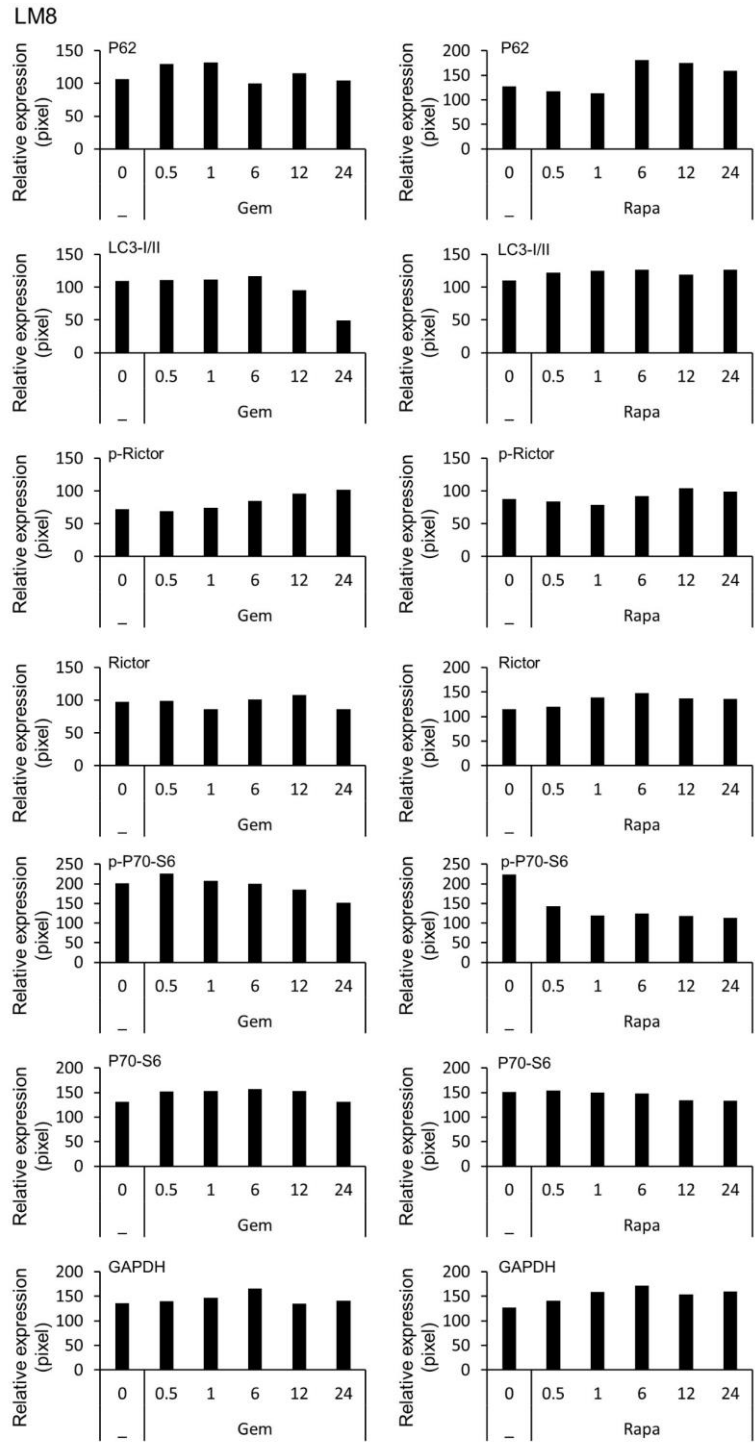

**Figure S7.** Quantification of western blot bands corresponding to p62, LC3-I/II, p-RICTOR, RICTOR, p-P70-S6, P70-S6, and GAPDH in LM8 cell lysates depicted in Figure 3a.

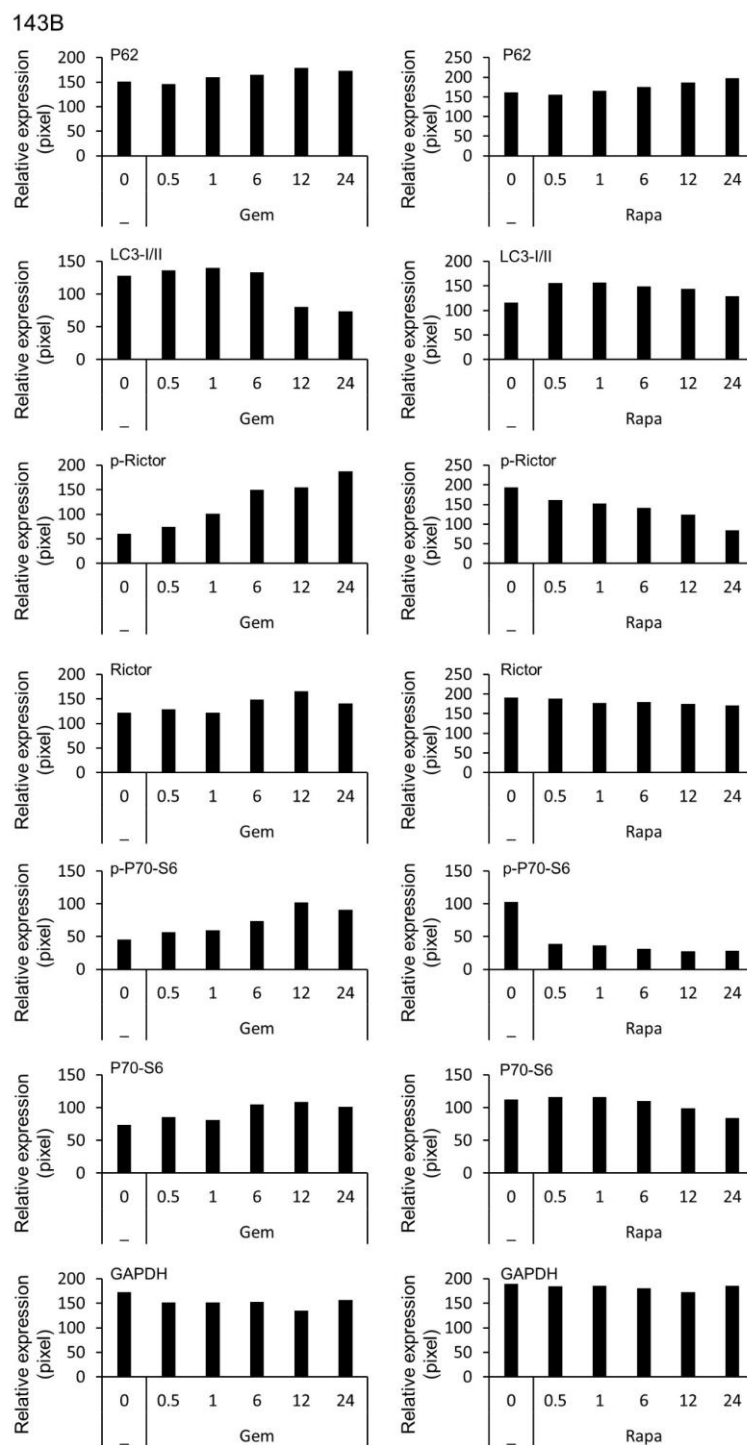

**Figure S8.** Quantification of western blot bands of p62, LC3-I/II, p-RICTOR, RICTOR, p-P70-S6, P70-S6, and GAPDH in 143B cell lysates depicted in Figure 3a.



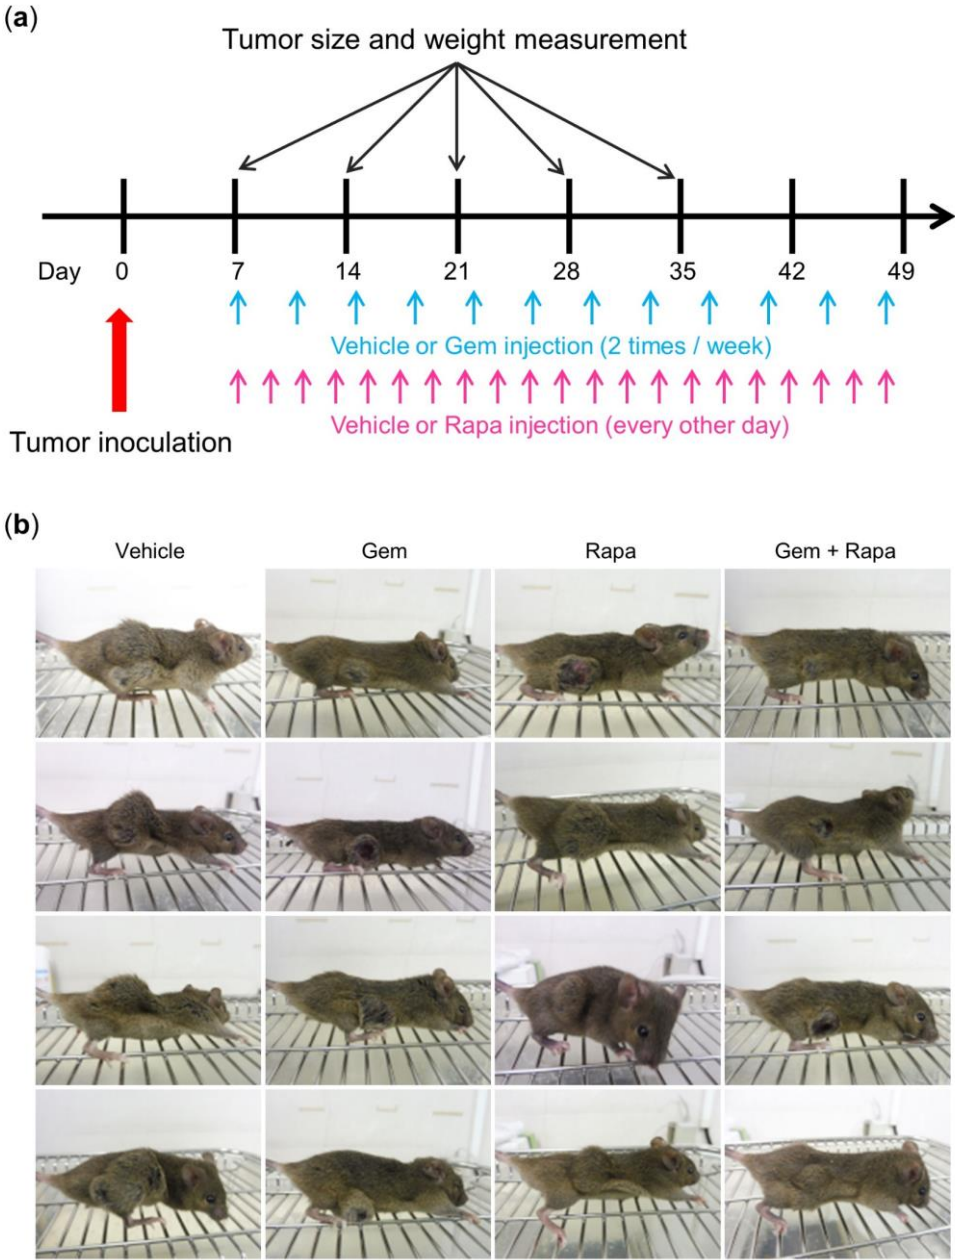

**Figure S9.** (a) Schematic diagram showing the experimental design for Gem and Rapa treatment of mice with allograft or xenograft osteosarcoma cell transplants. (b) Photos of tumor-bearing mice from Figure 4.

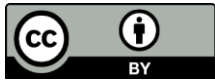

© 2020 by the authors. Submitted for possible open access publication under the terms and conditions of the Creative Commons Attribution (CC BY) license (<http://creativecommons.org/licenses/by/4.0/>).
